# Supplementary figures and images for: Nanotubes from bacteriophage tail sheath proteins: internalisation by cancer cells and macrophages
Source: Royal Society of Chemistry journal article supplement (doi:10.1039/d3na00166k), 2023-01-01

# Raw images of wester blots showing clathrin and dynamin silencing in HCT116 (A) and SW480 (B) cells

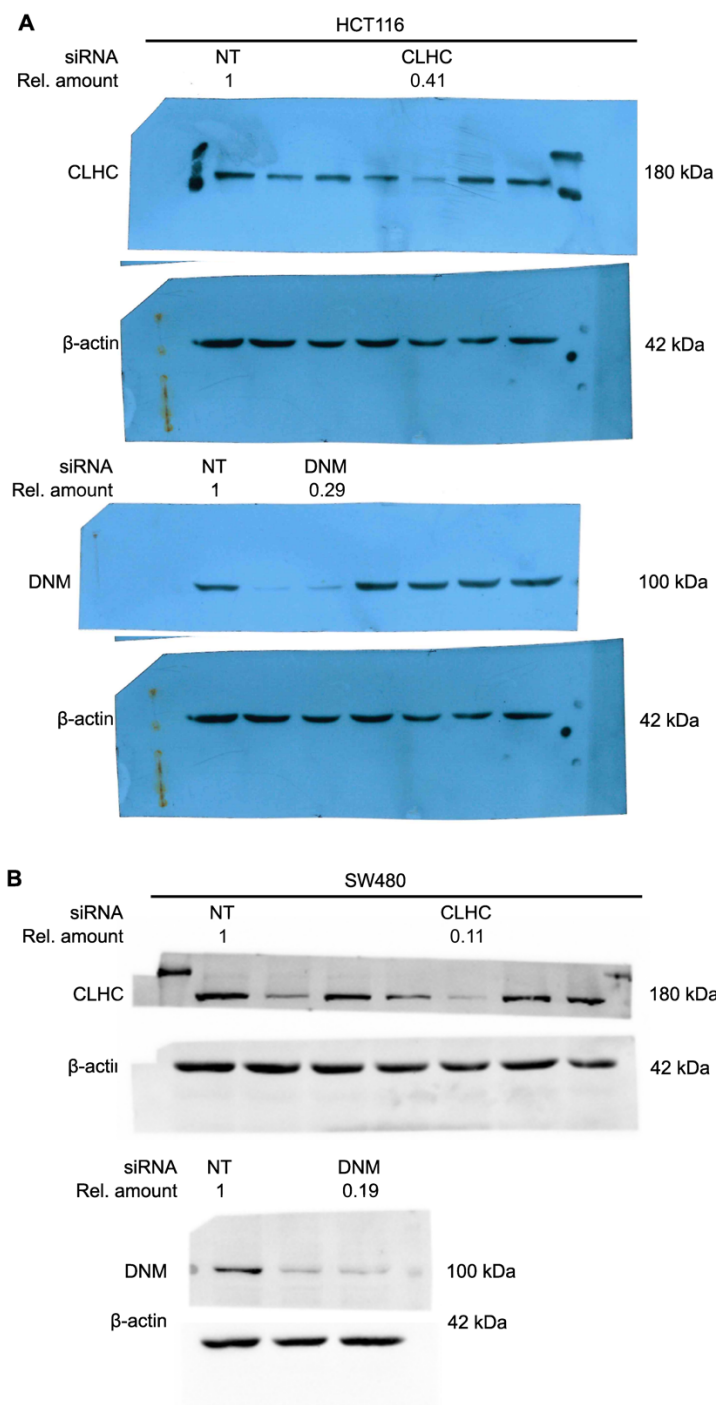

Supplement: d3na00166k1.pdf [file d3na00166k1.pdf]
